# Supplementary material
Source: HighWire-hosted journal article supplement (https://bmjopen.bmj.com/content/11/10/e053740)
Supplement: inline-supplementary-material-2 [file inline-supplementary-material-2.pdf]

## Supplemental material 2 – Factor analysis and Cronbach's alpha of the CIRF-Thai version

(n=120)

| Item                  | Factor 1 – Consumer utility rating scale | Factor 2 – Consumer design quality rating scale | Factor 3 – Consumer comprehensibility rating scale | Communality    |
|-----------------------|------------------------------------------|-------------------------------------------------|----------------------------------------------------|----------------|
| Precaution            | <b>0.836</b>                             | 0.092                                           | 0.179                                              | 0.739          |
| Direction             | <b>0.825</b>                             | 0.241                                           | 0.155                                              | 0.763          |
| Storage               | <b>0.759</b>                             | 0.230                                           | 0.100                                              | 0.638          |
| Benefit               | <b>0.755</b>                             | 0.099                                           | 0.255                                              | 0.645          |
| Contraindication      | <b>0.719</b>                             | 0.017                                           | 0.147                                              | 0.539          |
| Side effects          | <b>0.693</b>                             | 0.197                                           | 0.179                                              | 0.551          |
| Attractiveness        | 0.186                                    | <b>0.833</b>                                    | 0.112                                              | 0.741          |
| Spacing               | 0.185                                    | <b>0.792</b>                                    | 0.106                                              | 0.672          |
| Tone                  | 0.180                                    | <b>0.772</b>                                    | 0.185                                              | 0.662          |
| Organization          | 0.032                                    | <b>0.731</b>                                    | 0.218                                              | 0.582          |
| Print size            | 0.080                                    | <b>0.726</b>                                    | 0.307                                              | 0.627          |
| Helpfulness           | 0.160                                    | <b>0.723</b>                                    | 0.062                                              | 0.552          |
| Keep                  | 0.136                                    | 0.142                                           | <b>0.858</b>                                       | 0.775          |
| locate                | 0.127                                    | 0.162                                           | <b>0.808</b>                                       | 0.695          |
| Remember              | 0.258                                    | 0.142                                           | <b>0.799</b>                                       | 0.725          |
| Read                  | 0.193                                    | 0.315                                           | <b>0.761</b>                                       | 0.716          |
| Understand            | 0.302                                    | 0.176                                           | <b>0.740</b>                                       | 0.669          |
| Eigenvalues           | 6.974                                    | 2.376                                           | 1.943                                              |                |
| % of variance         | 41.024                                   | 13.976                                          | 11.431                                             |                |
| % Cumulative variance | 41.024                                   | 55.000                                          | 66.431                                             | Total = 66.431 |
| Cronbach's $\alpha$   | 0.884                                    | 0.880                                           | 0.896                                              | 0.904          |
